# Supplementary material
Source: PubMed Central journal article supplement (PMC4702028)
Supplement: 97320630011517S1.pdf [file 97320630011517S1.pdf]

## Supplementary material:

**Table 1:** Predicted MHC class II restricted peptides in virulent factors having human homologs using NETMHC 2.2 (affinity score: IC50 < 50).

| pos | matched peptide  | affinity(nM) | Allele       |
|-----|------------------|--------------|--------------|
| 7   | NYLAQTYSVLVTSA   | 30.3         | HLA-DRB10701 |
| 81  | LLAFTNPTVNSYKRL  | 28.2         | HLA-DRB10101 |
| 11  | YLQYTSGSTRTYPAGV | 38.8         | HLA-DRB10401 |
| 85  | FCLFSSGAALLGSPG  | 7.5          | HLA-DRB10101 |
| 68  | RNTVQFAAAVQAAME  | 6.8          | HLA-DRB10101 |
| 102 | RNTVQFAAAVQAAME  | 35.6         | HLA-DRB10701 |
| 17  | YLQYTSGSTRTYPAGV | 38.8         | HLA-DRB10401 |
| 5   | LGHFAAVSAATGLVV  | 3.7          | HLA-DRB10101 |
| 8   | QLTYRELDALADRLA  | 20.8         | HLA-DRB10401 |
| 194 | GNTVAMRLRPQSAMS  | 15.2         | HLA-DRB10101 |
| 8   | YARYLAEHGARRIVL  | 4.8          | HLA-DRB10701 |
| 11  | RHRLLSDVTRALADE  | 17.9         | HLA-DRB10301 |
| 148 | ILAELGMDTTTLVAA  | 34.4         | HLA-DRB10101 |
| 12  | LAELGMDTTTLVAAL  | 17.9         | HLA-DRB10301 |
| 6   | ERHTAINSLVTATHG  | 29.1         | HLA-DRB10401 |
| 20  | LDIFAALRSGGAIIV  | 4.9          | HLA-DRB10101 |
| 157 | LAYVLFTSGSTGEPK  | 13.4         | HLA-DRB10101 |
| 109 | TLLLADVLAAAPAEF  | 10.5         | HLA-DRB10101 |
| 195 | VQEALRSAAGHSAYP  | 15.7         | HLA-DRB10101 |
| 219 | GGHFYLNHDHLDAVAR | 17.5         | HLA-DRB10101 |
| 43  | KSLVANDVDTFVVQY  | 39           | HLA-DRB10301 |
| 303 | AAQRAVRAALNGRTA  | 28.1         | HLA-DRB10101 |
| 45  | YHDMGLILGICAPLV  | 12.6         | HLA-DRB10101 |
| 64  | RFDYEQLTAGQARPC  | 18           | HLA-DRB10101 |
| 120 | LPLYHDMGLILGICA  | 34.2         | HLA-DRB10101 |
| 40  | AVYRAALAAAGVQPE  | 5.4          | HLA-DRB10101 |
| 115 | KLMTRIAGAGAMGSV  | 8.8          | HLA-DRB10101 |
| 18  | VVTGLNNSVASGRIA  | 16.5         | HLA-DRB11302 |
| 43  | LPFYHDMGLVIGICA  | 14           | HLA-DRB10101 |
| 50  | VDYRLIPKHSGLMAL  | 17.8         | HLA-DRB10101 |
| 6   | DSAGGYLALALAQRL  | 15.7         | HLA-DRB10701 |
| 2   | HAFYLQYKNVKVDFA  | 5.9          | HLA-DRB10101 |
| 19  | WDYGALEPHISGQIN  | 10           | HLA-DRB11501 |
| 31  | YGALEPHISGQINEL  | 15.8         | HLA-DRB10101 |
| 50  | PDLWDYGALEPHIS   | 38.4         | HLA-DRB10101 |
| 41  | SLRLLQVGGSKLEPE  | 7.6          | HLA-DRB10101 |
| 154 | EGELLVRGPYTLNGY  | 40.6         | HLA-DRB10101 |
| 169 | PGDRVLLQLPNGCQF  | 47.7         | HLA-DRB10101 |
| 4   | QWSRLLAQRALDS    | 3.8          | HLA-DRB10101 |
| 111 | LLATAAARMVTAWRR  | 8.8          | HLA-DRB10101 |
| 163 | DSIVALSVVQAARRR  | 12.2         | HLA-DRB10101 |
| 165 | QAAYVIFTSGTTGTP  | 12.5         | HLA-DRB10101 |
| 392 | AYVIFTSGTTGTPKG  | 34.4         | HLA-DRB10101 |
| 438 | GELVTAVAEQTLGAL  | 42.3         | HLA-DRB10101 |
| 129 | DLDRIRARVAAALPE  | 10.4         | HLA-DRB10101 |
| 54  | GVDLDRIRARVAAAL  | 22.9         | HLA-DRB10301 |
| 390 | YLIYTSGTTGLPKGV  | 41.8         | HLA-DRB10101 |
| 59  | ICVSYRITGDIDLAR  | 24.4         | HLA-DRB10301 |
| 111 | VDALSANIVSAAVAD  | 13           | HLA-DRB10101 |
| 34  | RGERFVDALSANIVS  | 9.8          | HLA-DRB10701 |
| 41  | GERFVDALSANIVSA  | 30.3         | HLA-DRB11302 |
| 115 | AANRLLDVMAAQLRA  | 13.4         | HLA-DRB10101 |
| 263 | GHSLGEVAAAYLAGS  | 40.6         | HLA-DRB10101 |
| 90  | VGHSLGEVAAAYLAG  | 39.8         | HLA-DRB10701 |
| 102 | LTVDTS CSSALAAFH | 39.6         | HLA-DRB10101 |
| 164 | VQFVGPLSVVDSALA  | 42.6         | HLA-DRB10101 |

|     |                 |      |              |
|-----|-----------------|------|--------------|
| 103 | SFAILHPKKYEEIVR | 24.3 | HLA-DRB10101 |
| 53  | GKTTIARVVANILAG | 12   | HLA-DRB10101 |
| 133 | TLLLGPPGTGKTSVA | 39   | HLA-DRB10101 |

**Table 2:** Predicted MHC class I restricted peptides in virulent factors having human homologs using NETMHC 2.2 (affinity score: IC 50 < 50).

| pos  | matched peptide | affinity(nM) | Allele |
|------|-----------------|--------------|--------|
| 18   | ALLSGLLRA       | 26           | A*0201 |
| 394  | FIDEAYALV       | 5            | A*0201 |
| 438  | AIINTLLLY       | 26           | A*1101 |
| 4    | FLITVALAL       | 9            | A*0201 |
| 281  | LLAEAQAEL       | 17           | A*0201 |
| 499  | LPRTSSGKL       | 7            | B*0702 |
| 332  | APAGRPLL        | 14           | B*0702 |
| 272  | TPATPATPV       | 20           | B*0702 |
| 236  | YPAVLTSVP       | 9            | B*0702 |
| 685  | PSDPTALAY       | 14           | A*0101 |
| 862  | SLVGYVTPA       | 13           | A*0201 |
| 218  | FYHDMGLVI       | 42           | A2402  |
| 166  | YLQYKNVKV       | 9            | A*0201 |
| 1580 | ALAAAILADV      | 13           | A*0201 |
| 697  | TSGSTGEPK       | 41           | A*1101 |
| 16   | LPRRLAIAA       | 33           | B*0702 |

**Table 3:** Human homologs of *M. tuberculosis* virulent factors identified using BLASTP search (cut-off E value < 0.01)

| <i>M. tuberculosis</i> |                                       | Human        |                                                  | Sequence identity (%) |
|------------------------|---------------------------------------|--------------|--------------------------------------------------|-----------------------|
| VFG                    | GenBank Description                   | Gene ID      | GenBank Description                              |                       |
| 1384                   | Pyrroline-5-carboxylase (proC)        | NP_075566    | Pyrroline-5-carboxylate reductase 3              | 32                    |
| 1387                   | SAICAR synthetase (purC)              | NP_001072993 | Multi-functional protein ADE2 isoform 1          | 21                    |
| 1393                   | Fatty acyl-AMP ligase (fadD33)        | XP_005257758 | Acyl-CoA synthetase family member 2              | 25                    |
| 1399                   | Glutamine synthetase (GlnA1)          | NP_057655    | Lengsin isoform A                                | 24                    |
| 1403                   | Phenyloxazoline synthase MbtB         | XP_005265782 | Acyl-CoA synthetase isoform X5                   | 27                    |
| 1408                   | Myco-cerosic acid synthase (Mas)      | NP_004095    | Fatty acid synthase                              | 30                    |
| 1415                   | Esterase/lipase (LipF)                | NP_997248    | Aryl acetamide deacetylase-like 2 precursor      | 34                    |
| 1811                   | fbpC2                                 | NP_001975    | S-formyl glutathione hydrolase                   | 24                    |
| 1812                   | Secreted antigen 85-B FbpB (85B)      | XP_005266335 | S-formylglutathione hydrolase isoform X1         | 31                    |
| 1817                   | Salicyl-S-ArCP synthetase             | NP_001230208 | Acyl-CoA synthetase family member 3              | 27                    |
| 1820                   | Peptide synthetase (MbtF)             | NP_115890    | Acetyl-coenzyme A synthetase 2-like              | 23                    |
| 1821                   | Peptide synthetase (MbtE)             | XP_005265781 | Acyl-CoA synthetase isoform X4                   | 26                    |
| 1822                   | Poly ketide synthetase (MbtD)         | NP_004095    | Fatty acid synthase                              | 26                    |
| 1823                   | Polyketidesynthetase (MbtC)           | NP_004095    | Fatty acid synthase                              | 33                    |
| 1826                   | GTP pyrophosphokinase (RelA)          | NP_940929    | 3'-pyrophos-phohydrolase MESH1                   | 39                    |
| 2380                   | ESX-1 type VII secretion protein      | XP_005264430 | ATPase family AAA domain 2B isoform X2           | 31                    |
| 1404                   | Alkyl hydroperoxidoreductase C (AhpC) | NP_054817    | Thio-redoxin-dependent peroxide reductase        | 37                    |
| 1407                   | Fatty-acid-AMP ligase (FadD26)        | NP_055789    | Disco-interacting protein 2 homolog C            | 26                    |
| 1409                   | Fatty-acid-AMP ligase (FadD28)        | XP_005252487 | Disco-interacting protein 2 homolog C isoform X5 | 25                    |
| 1421                   | Superoxide dismutase [FE] (SodA)      | NP_001019636 | Superoxide dismutase [Mn]                        | 52                    |
| 1825                   | Sensor histidine kinase (DevS)        | NP_001137311 | cGMP-dependent 3',5'-cyclic phosphodiesterase    | 27                    |
| 2391                   | Membrane-anchored mycosin (MycP1)     | NP_777596    | Proprotein convert a ses-ubtilisin               | 27                    |
| 2401                   | ESX conserved EccA5                   | NP_054828    | ATPase family AAA domain-containing protein 2    | 30                    |
| 1380                   | Cu, Zn Superoxide dismutase (sodC)    | NP_005116    | Copper chaperone for superoxide dismutase        | 28                    |
| 1397                   | Heat shock protein (HspX)             | NP_077721    | Outer dense fiber protein 1                      | 34                    |

**Table 4:** Predicted B cell epitopes in virulent factors and its corresponding human homologs using BCPRED (cut-off score < 0.9).

| VFG  | Epitope ( <i>M. tb</i> ) | Human AC #   | Matched peptide (human) | Domain name            |
|------|--------------------------|--------------|-------------------------|------------------------|
| 1393 | STCAVTVPVPGIGLLADRVI     | XP_005257758 | NSPVTFAHFPEPTVEQKAES    | Malonyl-CoA synthetase |

|      |                       |              |                       |                               |
|------|-----------------------|--------------|-----------------------|-------------------------------|
| 1399 | DAISGWWNTGAATEADGSPN  | NP_057655    | QELVDGLYHTGANVESFSSS  | Glutamine synthetase          |
| 1403 | FAGLGGATETAHVHATIFEVQ | XP_005265782 | IFNVYGITEVSSWATIYRIP  | Adenylate forming             |
| 1403 | ADSGDDCPDWVAGELWVSGR  | XP_005265782 | RDINGFTIQEGSGQVFLGGR  | Adenylate forming             |
| 1404 | IVDPNNEIQFVSATAGSVGR  | NP_054817    | IIDPNGVIKHLVNDLPVGR   | Peroxiredoxin (PRX)           |
| 1407 | PKQTAQVFDAKLVDPAPAAP  | NP_055789    | GDESLQSDHFNLSFGDTQ    | Adenylate forming             |
| 1408 | AIVEEAPAEASAPESPFGDA  | NP_004095    | IILRPNTQPPPAPAPHATLP  | polyketide synthases          |
| 1409 | VHGDNVANGYWQKPDESERT  | XP_005252487 | VCAVATGTSYYGLSGMTKNT  | Adenylate forming             |
| 1421 | AEYTLPLDWDYGALEPHIS   | NP_001019636 | KHSLPDLPHYDYGALEPHINA | Fe/Mn superoxide dismutases   |
| 1811 | MPAWLQANKGVSPGTGNAAVG | NP_001975    | LPQLINANFPVDPQRMSIFG  | S-formylglutathione hydrolase |
| 1817 | LLRAGAIPVMCLPGHRAAEL  | NP_001230208 | SWMSGGVAVPLYRKHPAAQ   | Malonyl-CoA synthetase        |
| 1820 | RVAEILRQTSAPVVIDEGVF  | NP_115890    | RVVELKKIVDEAVKHCPTVQ  | Malonyl-CoA synthetase        |
| 1820 | DENALAAINVTEGPATPPQT  | NP_115890    | MRLLLRKIITSEAQELGDTT  | Malonyl-CoA synthetase        |
| 1821 | TSGTTGLPKGVAVPHRPVAE  | XP_005265781 | TSGTTGIPKIVRVPHKCIVP  | Adenylate forming domain      |
| 1821 | PKINTTMHLLDDSLQPVPTG  | XP_005265781 | PLLGTVVEVRDTNGFTIQEG  | Adenylate forming             |
| 1823 | LAGHDVGCYVGASALEYGPA  | NP_004095    | LRGTHTGWVWGVSGSETSEA  | Polyketide synthases          |
| 1823 | GMVEGHGTATRLGDRTELRS  | NP_004095    | EYIEAHGTGTVKVGDPQELNG | Polyketide synthases          |
| 2380 | DEAYALVQERDGRTPFGQE   | XP_005264430 | DEIDGLAPVRSSRQDQIHSS  | ATPase family AAA             |
| 2389 | SPPPPDVPTLVVPSGTPGT   | NP_055853    | TPEEPASPAAAVPTPEEPTS  | EspG family                   |
| 2389 | PIPGAVPTPITPTGTPVTP   | NP_055853    | PEEPTSPAAAVPTPEEPTSP  | EspG family                   |
| 2391 | DPRGWNNVQTVVTPAWYAPL  | NP_777596    | APEVITVGATNAQDQPVTLG  | Peptidase S8 & S53            |
| 2401 | HTLHEKGYSQGDPYGNAIN   | XP_005264430 | DGLAPVRSSRQDQIHSSIVS  | ATPase family AAA             |
